# Supplementary material
Source: PubMed Central journal article supplement (PMC3429644)

**a**

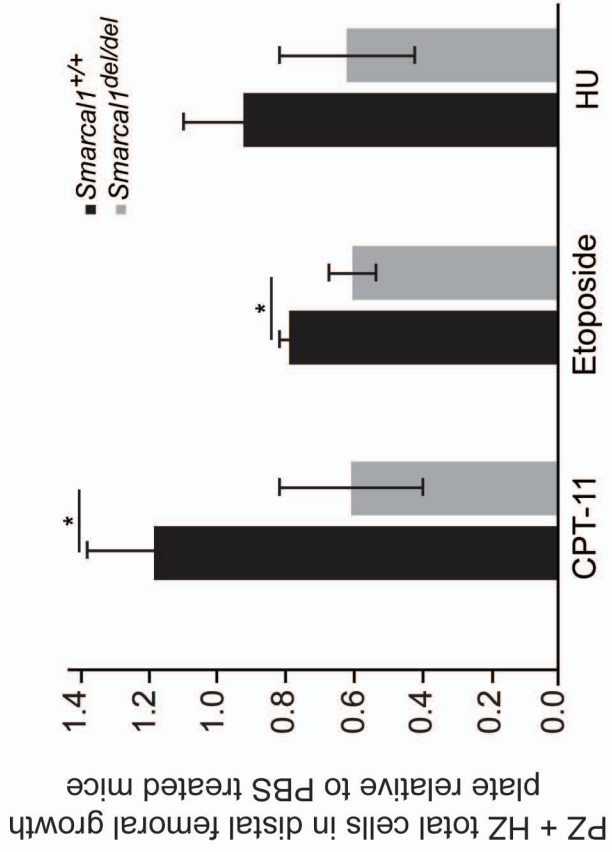

**b**

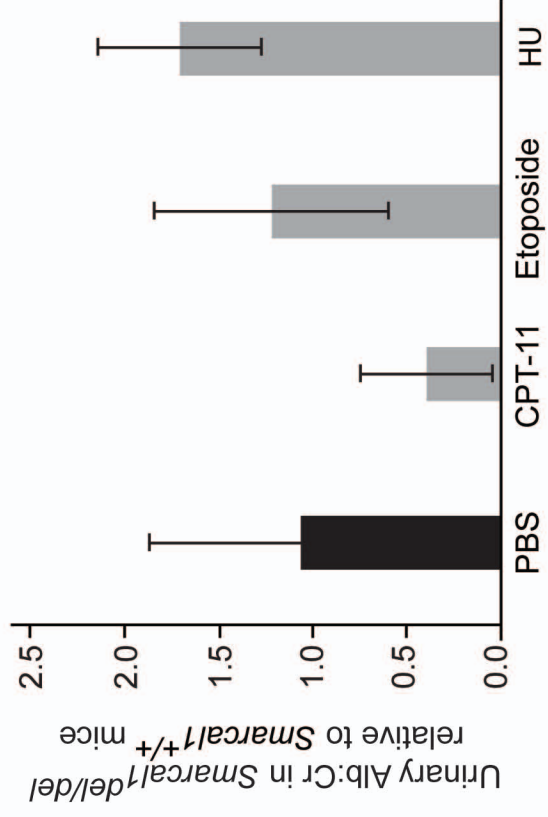

**c**

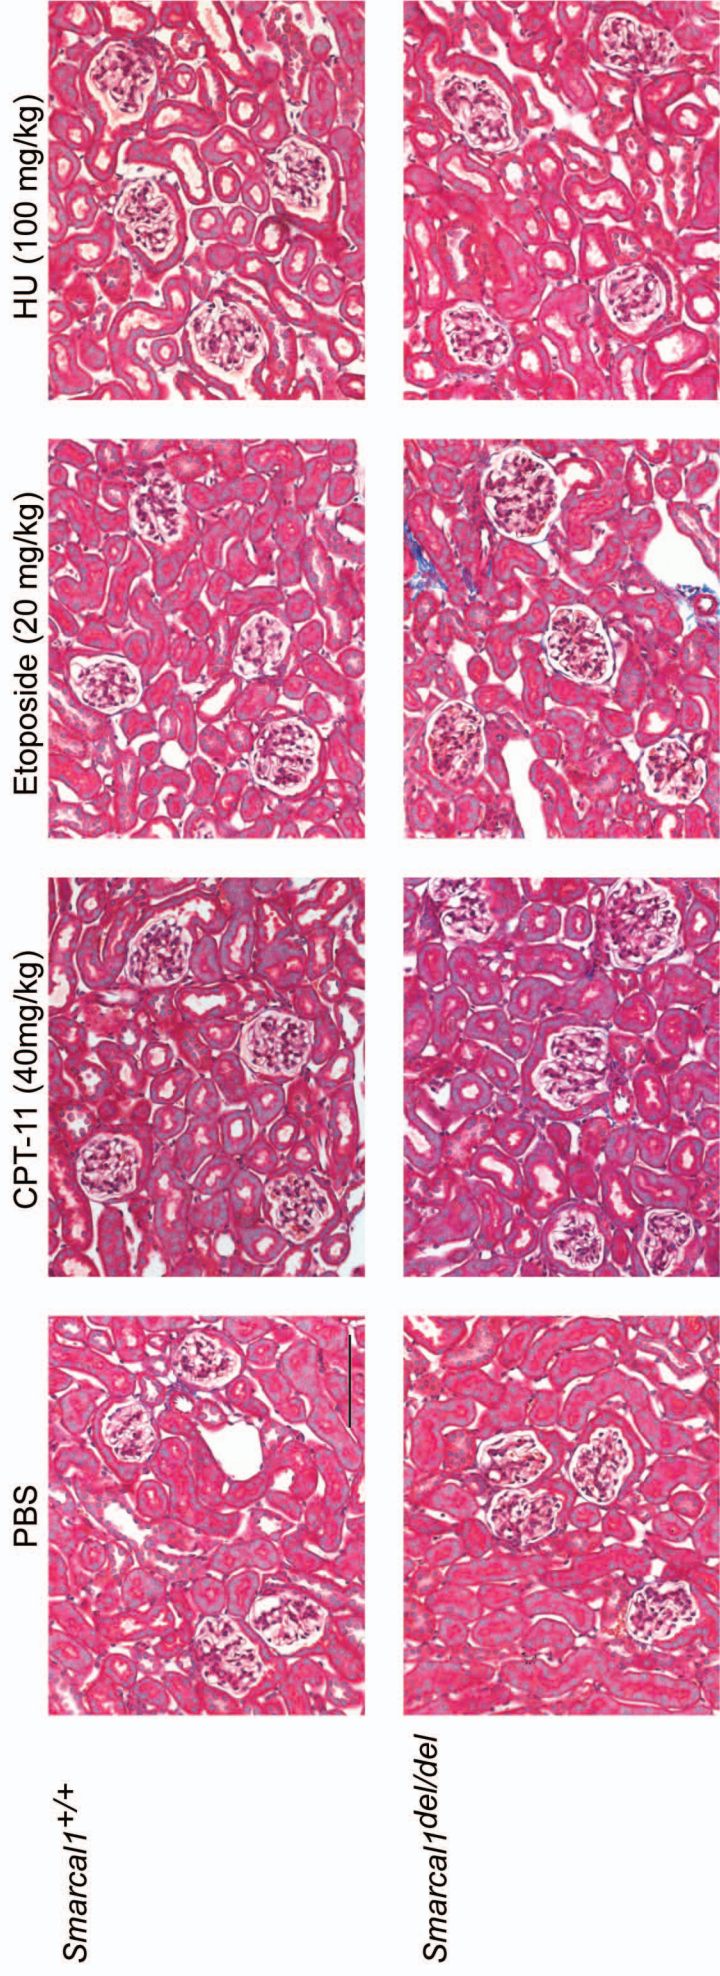

Supplement: NIHMS381031-supplement-Supp_Fig_S1-S3.pdf [file NIHMS381031-supplement-Supp_Fig_S1-S3.pdf]
